# Supplementary material for: Regressive evolution of an effector following a host jump in the Irish potato famine pathogen lineage
Source: PLOS journal article supplement (doi:10.1371/journal.ppat.1010918), 2022-10-27
Supplement: S6 (10.1371/journal.ppat.1010918.s006) [file journal.ppat.1010918.s006]

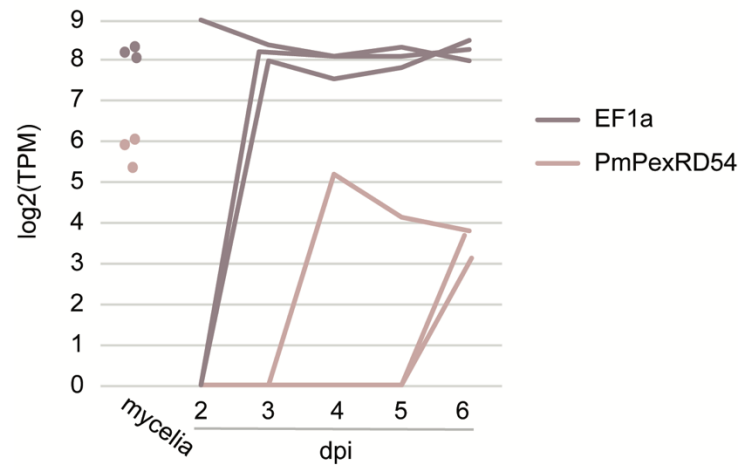

**S3 Fig. PmPexRD54 is expressed during *P. mirabilis* infection of *M. jalapa*.** Graph representing the transcript abundance for PmPexRD54 and the control elongation factor 1-alpha (EF1a) in *P. mirabilis* strain 09316 mycelia and 2–6 days post infection (dpi) of *M. jalapa*, across three technical replicates. Transcript abundance was measured by RNAseq and is reported in transcripts per million (TPM).
